# Supplementary material
Source: Springer Nature journal article supplement (https://www.springermedizin.de/resource/supplementary/12887_2009_278_MOESM2_ESM.pdf/9477676)
Supplement: MOESM2 [file 9477676]

Birth Weight

< 600g

> 600g

Obtain radiograph of wrist and/or knee to evaluate for rickets at age six weeks or at time of full feeds.

Alkaline Phosphatase Activity  
(measured weekly or bi-weekly)

< 1000 IU/L

Any Value  
>1000 IU/L

No clinical suspicion of rickets

Clinical suspicion of rickets  
(incidental findings on unrelated radiograph, fracture, parenteral nutrition for >3-4 weeks, APA >800 IU/L on two measurements taken at least one week apart)

Obtain radiograph of wrist and/or knee to evaluate for rickets.

Continue to monitor alkaline phosphatase activity until <500 IU/L.

Obtain radiograph of wrist and/or knee to evaluate for rickets.
